# Supplementary material for: Prevalence and Antifungal Susceptibility of Clinically Relevant Candida Species, Identification of Candida auris and Kodamaea ohmeri in Bangladesh
Source: MDPI journal article supplement (doi:10.3390/tropicalmed7090211), 2022-08-26
Supplement: s1 [file s1]

(a)

|               |                                                               |     |
|---------------|---------------------------------------------------------------|-----|
| A173-22       | -----ACTGTCATTGATGGCATTAAATTATTTTTGTCCCTTAGTGTTACA            | 45  |
| A1201-57      | -----ACTGTCATTGATGGCATTAAATTATTTTTGTCCCTTAGTGTTACA            | 45  |
| SC5314        | ATGGCTATTGTTGAACTGTCATTGATGGCATTAAATTATTTTTGTCCCTTAGTGTTACA   | 60  |
| *****         |                                                               |     |
| A173-22       | CAACAGATCAGTATATTATTAGGGGTTCCATTTGTTTACAACCTTAGTATGGCAATATTTA | 105 |
| A1201-57      | CAACAGATCAGTATATTATTAGGGGTTCCATTTGTTTACAACCTTAGTATGGCAATATTTA | 105 |
| SC5314        | CAACAGATCAGTATATTATTAGGGGTTCCATTTGTTTACAACCTTAGTATGGCAATATTTA | 120 |
| *****         |                                                               |     |
| A173-22       | TATTCATTAAGAAAAGATAGAGCTCCATTAGTGTTTTATTGGATTCCTTGGTTTGGTTCT  | 165 |
| A1201-57      | TATTCATTAAGAAAAGATAGAGCTCCATTAGTGTTTTATTGGATTCCTTGGTTTGGTTCT  | 165 |
| SC5314        | TATTCATTAAGAAAAGATAGAGCTCCATTAGTGTTTTATTGGATTCCTTGGTTTGGTTCT  | 180 |
| *****         |                                                               |     |
| A173-22       | GCAGCTTCATATGGTCAACAACCTTATGAATTTTTCGAATCATGTCGTCAAAAGTATGGT  | 225 |
| A1201-57      | GCAGCTTCATATGGTCAACAACCTTATGAATTTTTCGAATCATGTCGTCAAAAGTATGGT  | 225 |
| SC5314        | GCAGCTTCATATGGTCAACAACCTTATGAATTTTTCGAATCATGTCGTCAAAAGTATGGT  | 240 |
| *****         |                                                               |     |
| A173-22       | GATGTATTTTCATTATGTTATTAGGGAAAATTATGACGGTTTATTTAGGTCCAAAAGGT   | 285 |
| A1201-57      | GATGTATTTTCATTATGTTATTAGGGAAAATTATGACGGTTTATTTAGGTCCAAAAGGT   | 285 |
| SC5314        | GATGTATTTTCATTATGTTATTAGGGAAAATTATGACGGTTTATTTAGGTCCAAAAGGT   | 300 |
| *****         |                                                               |     |
| A173-22       | CATGAATTTGTTTTAATGCTAAATTATCTGATGTTTCTGTTGAAGATGCTTATAAACAT   | 345 |
| A1201-57      | CATGAATTTGTTTTAATGCTAAATTATCTGATGTTTCTGTTGAAGATGCTTATAAACAT   | 345 |
| SC5314        | CATGAATTTGTTTTAATGCTAAATTATCTGATGTTTCTGCTGAAGATGCTTATAAACAT   | 360 |
| ***** *****   |                                                               |     |
| 341           |                                                               |     |
| A173-22       | TTAACTACTCCAGTTTTCGGTAAAGGGGTATTTATGATTGTCAAATTCAGATTAATG     | 405 |
| A1201-57      | TTAACTACTCCAGTTTTCGGTAAAGGGGTATTTATGATTGTCAAATTCAGATTAATG     | 405 |
| SC5314        | TTAACTACTCCAGTTTTCGGTAAAGGGGTATTTATGATTGTCAAATTCAGATTAATG     | 420 |
| *****         |                                                               |     |
| A173-22       | GAACAAAAAACTTGCTAAATTTGCTTTGACTACTGATTCATTTAAAAGATATGTTCCCT   | 465 |
| A1201-57      | GAACAAAAAACTTGCTAAATTTGCTTTGACTACTGATTCATTTAAAAGATATGTTCCCT   | 465 |
| SC5314        | GAACAAAAAACTTGCTAAATTTGCTTTGACTACTGATTCATTTAAAAGATATGTTCCCT   | 480 |
| ***** * ***** |                                                               |     |
| 433, 435      |                                                               |     |
| A173-22       | AAGATTAGAGAAGAAATTTTGAATTATTTTGTACTGATGAAAGTTTCAAATTGAAAGAA   | 525 |
| A1201-57      | AAGATTAGAGAAGAAATTTTGAATTATTTTGTACTGATGAAAGTTTCAAATTGAAAGAA   | 525 |
| SC5314        | AAGATTAGAGAAGAAATTTTGAATTATTTTGTACTGATGAAAGTTTCAAATTGAAAGAA   | 540 |
| *****         |                                                               |     |
| A173-22       | AAAACATCATGGGGTTGCCAATGTTATGAAAACCAACCAGAAATTACTATTTTCACTGCT  | 585 |
| A1201-57      | AAAACATCATGGGGTTGCCAATGTTATGAAAACCAACCAGAAATTACTATTTTCACTGCT  | 585 |
| SC5314        | AAAACATCATGGGGTTGCCAATGTTATGAAAACCAACCAGAAATTACTATTTTCACTGCT  | 600 |
| *****         |                                                               |     |
| A173-22       | TCAAGATCTTTATTTGGTGATGAAATGAGAAGAATTTTGACCGTTCAATTTGCTCAACTA  | 645 |
| A1201-57      | TCAAGATCTTTATTTGGTGATGAAATGAGAAGAATTTTGACCGTTCAATTTGCTCAACTA  | 645 |
| SC5314        | TCAAGATCTTTATTTGGTGATGAAATGAGAAGAATTTTGACCGTTCAATTTGCTCAACTA  | 660 |
| *****         |                                                               |     |
| A173-22       | TATTCTGATTTAGATAAAGGTTTTACCCCTATTAATTTGTTTTCCCTAATTTACCTTTA   | 705 |
| A1201-57      | TATTCTGATTTAGATAAAGGTTTTACCCCTATTAATTTGTTTTCCCTAATTTACCTTTA   | 705 |
| SC5314        | TATTCTGATTTAGATAAAGGTTTTACCCCTATTAATTTGTTTTCCCTAATTTACCTTTA   | 720 |
| *****         |                                                               |     |
| A173-22       | CCTCATTATTGGAGACGTGATGCTGCTCAAAGAAAATCTCTGCTACTTATATGAAAGAA   | 765 |
| A1201-57      | CCTCATTATTGGAGACGTGATGCTGCTCAAAGAAAATCTCTGCTACTTATATGAAAGAA   | 765 |
| SC5314        | CCTCATTATTGGAGACGTGATGCTGCTCAAAGAAAATCTCTGCTACTTATATGAAAGAA   | 780 |
| *****         |                                                               |     |
| A173-22       | ATTAACTGAGAAGAGAACGTGGTGATATTGATCCAAATCGTGATTAATTGATTCCTTA    | 825 |
| A1201-57      | ATTAACTGAGAAGAGAACGTGGTGATATTGATCCAAATCGTGATTAATTGATTCCTTA    | 825 |
| SC5314        | ATTAACTGAGAAGAGAACGTGGTGATATTGATCCAAATCGTGATTAATTGATTCCTTA    | 840 |
| *****         |                                                               |     |

|          |                                                                |      |
|----------|----------------------------------------------------------------|------|
| A173-22  | TTGATTCATTCAACTTATAAAGATGGTGTGAAAATGACTGATCAAGAAATTGCTAATCTT   | 885  |
| A1201-57 | TTGATTCATTCAACTTATAAAGATGGTGTGAAAATGACTGATCAAGAAATTGCTAATCTT   | 885  |
| SC5314   | TTGATTCATTCAACTTATAAAGATGGTGTGAAAATGACTGATCAAGAAATTGCTAATCTT   | 900  |
| *****    |                                                                |      |
| A173-22  | TTAATTGGTATTCTTATGGGTGGTCAACATACTTCTGCTTCTACTTCTGCTTGGTTCCTG   | 945  |
| A1201-57 | TTAATTGGTATTCTTATGGGTGGTCAACATACTTCTGCTTCTACTTCTGCTTGGTTCCTG   | 945  |
| SC5314   | TTAATTGGTATTCTTATGGGTGGTCAACATACTTCTGCTTCTACTTCTGCTTGGTTCCTG   | 960  |
| *****    |                                                                |      |
| A173-22  | TTACATTTAGGTGAAAAACCTCATTACAAGATGTTATTTATCAAGAAGTTGTTGAATTA    | 1005 |
| A1201-57 | TTACATTTAGGTGAAAAACCTCATTACAAGATGTTATTTATCAAGAAGTTGTTGAATTA    | 1005 |
| SC5314   | TTACATTTAGGTGAAAAACCTCATTACAAGATGTTATTTATCAAGAAGTTGTTGAATTA    | 1020 |
| *****    |                                                                |      |
| A173-22  | TTGAAAGAAAAAGGTGGTGATTGAATGATTTGACTTATGAAGATTACAAAAATTACCA     | 1065 |
| A1201-57 | TTGAAAGAAAAAGGTGGTGATTGAATGATTTGACTTATGAAGATTACAAAAATTACCA     | 1065 |
| SC5314   | TTGAAAGAAAAAGGTGGTGATTGAATGATTTGACTTATGAAGATTACAAAAATTACCA     | 1080 |
| *****    |                                                                |      |
| A173-22  | TCAGTCAATAACACTATTAAGGAACTCTCAGAATGCATATGCCATTACATTCTATTTTT    | 1125 |
| A1201-57 | TCAGTCAATAACACTATTAAGGAACTCTCAGAATGCATATGCCATTACATTCTATTTTT    | 1125 |
| SC5314   | TCAGTCAATAACACTATTAAGGAACTCTCAGAATGCATATGCCATTACATTCTATTTTT    | 1140 |
| *****    |                                                                |      |
| A173-22  | AGAAAAGTTACTAACCATTAAAGAATCCCTGAAACCAATTATATTGTTCCAAAAGGTCAT   | 1185 |
| A1201-57 | AGAAAAGTTACTAACCATTAAAGAATCCCTGAAACCAATTATATTGTTCCAAAAGGTCAT   | 1185 |
| SC5314   | AGAAAAGTTACTAACCATTAAAGAATCCCTGAAACCAATTATATTGTTCCAAAAGGTCAT   | 1200 |
| *****    |                                                                |      |
| A173-22  | TATGTTTTAGTTTCTCCAGGTTATGCTCATACTAGTGAAAGATATTTTGATAACCGTGAA   | 1245 |
| A1201-57 | TATGTTTTAGTTTCTCCAGGTTATGCTCATACTAGTGAAAGATATTTTGATAACCGTGAA   | 1245 |
| SC5314   | TATGTTTTAGTTTCTCCAGGTTATGCTCATACTAGTGAAAGATATTTTGATAACCGTGAA   | 1260 |
| *****    |                                                                |      |
| A173-22  | GATTTTGATCCAAC TAGATGGGATACTGCTGCTGCCAAAGCTAATTCTGTTTCATTTAAC  | 1305 |
| A1201-57 | GATTTTGATCCAAC TAGATGGGATACTGCTGCTGCCAAAGCTAATTCTGTTTCATTTAAC  | 1305 |
| SC5314   | GATTTTGATCCAAC TAGATGGGATACTGCTGCTGCCAAAGCTAATTCTGTTTCATTTAAC  | 1320 |
| *****    |                                                                |      |
| A173-22  | TCTTCTGATGAAGTTGATTATGGGTTTGGGAAAGTTTCTAAAGGGGTTTCTTCACCTTAT   | 1365 |
| A1201-57 | TCTTCTGATGAAGTTGATTATGGGTTTGGGAAAGTTTCTAAAGGGGTTTCTTCACCTTAT   | 1365 |
| SC5314   | TCTTCTGATGAAGTTGATTATGGGTTTGGGAAAGTTTCTAAAGGGGTTTCTTCACCTTAT   | 1380 |
| *****    |                                                                |      |
| A173-22  | TTACCATTTGGTGGTGGTAGACATAGATGTATTGGGGAACAATTTGCTTATGTTCAATTA   | 1425 |
| A1201-57 | TTACCATTTGGTGGTGGTAGACATAGATGTATTGGGGAACAATTTGCTTATGTTCAATTA   | 1425 |
| SC5314   | TTACCATTTGGTGGTGGTAGACATAGATGTATTGGGGAACAATTTGCTTATGTTCAATTA   | 1440 |
| *****    |                                                                |      |
| A173-22  | GGAACCATTTTAACTACTTTTGTGTTTATAATTTAAGATGGACTATTGATGGTTATAAAGTG | 1485 |
| A1201-57 | GGAACCATTTTAACTACTTTTGTGTTTATAATTTAAGATGGACTATTGATGGTTATAAAGTG | 1485 |
| SC5314   | GGAACCATTTTAACTACTTTTGTGTTTATAATTTAAGATGGACTATTGATGGTTATAAAGTG | 1500 |
| *****    |                                                                |      |
| A173-22  | CCTGACCCTGATTATAGTTCAATGGTGGTTTTACCTACTGAACCAGCAGAAATCATTTGG   | 1545 |
| A1201-57 | CCTGACCCTGATTATAGTTCAATGGTGGTTTTACCTACTGAACCAGCAGAAATCATTTGG   | 1545 |
| SC5314   | CCTGACCCTGATTATAGTTCAATGGTGGTTTTACCTACTGAACCAGCAGAAATCATTTGG   | 1560 |
| *****    |                                                                |      |
| A173-22  | GAAAAAGAGAAACT-----                                            | 1560 |
| A1201-57 | GAAAAAGAGAAACT-----                                            | 1560 |
| SC5314   | GAAAAAGAGAAACTTGTATGTTTAA                                      | 1587 |
| *****    |                                                                |      |

|            |                                                               |     |
|------------|---------------------------------------------------------------|-----|
| <b>(b)</b> |                                                               |     |
| SC5314     | MAIVETVIDGINYFLSLSVTQQISILLGVPFVYNLVWQYLYSLRKDRAPLVFYWIPWFGS  | 60  |
| A173-22    | -----TVIDGINYFLSLSVTQQISILLGVPFVYNLVWQYLYSLRKDRAPLVFYWIPWFGS  | 55  |
| A1201-57   | -----TVIDGINYFLSLSVTQQISILLGVPFVYNLVWQYLYSLRKDRAPLVFYWIPWFGS  | 55  |
| *****      |                                                               |     |
| SC5314     | AASYGQQPYEFFESCRQKYGDVFSFMLLGKIMTVYLGPKGHEFVFNAKLSDVSAEDAYKH  | 120 |
| A173-22    | AASYGQQPYEFFESCRQKYGDVFSFMLLGKIMTVYLGPKGHEFVFNAKLSDVSVEDAYKH  | 115 |
| A1201-57   | AASYGQQPYEFFESCRQKYGDVFSFMLLGKIMTVYLGPKGHEFVFNAKLSDVSVEDAYKH  | 115 |
| *****      |                                                               |     |
| 114        |                                                               |     |
| SC5314     | LTPVFGKGVYIDCPNSRLMEQKKFAKFALTTDSFKRYVPKIREEILNYFVTDESFKLKE   | 180 |
| A173-22    | LTPVFGKGVYIDCPNSRLMEQKKLAKFALTTDSFKRYVPKIREEILNYFVTDESFKLKE   | 175 |
| A1201-57   | LTPVFGKGVYIDCPNSRLMEQKKLAKFALTTDSFKRYVPKIREEILNYFVTDESFKLKE   | 175 |
| *****      |                                                               |     |
| 145        |                                                               |     |
| SC5314     | KTHGVANVMKTQPEITIFTASRSLFGDEMRRIFDRSFAQLYSDLDKGFTPINFVFPNLPL  | 240 |
| A173-22    | KTHGVANVMKTQPEITIFTASRSLFGDEMRRIFDRSFAQLYSDLDKGFTPINFVFPNLPL  | 235 |
| A1201-57   | KTHGVANVMKTQPEITIFTASRSLFGDEMRRIFDRSFAQLYSDLDKGFTPINFVFPNLPL  | 235 |
| *****      |                                                               |     |
| SC5314     | PHYWRRDAAQKKISATYMKEIKLRRERGDIDPNRDLIDSLLIHSTYKDGVKMTDQEI ANL | 300 |
| A173-22    | PHYWRRDAAQKKISATYMKEIKLRRERGDIDPNRDVIDSLLIHSTYKDGVKMTDQEI ANL | 295 |
| A1201-57   | PHYWRRDAAQKKISATYMKEIKLRRERGDIDPNRDLIDSLLIHSTYKDGVKMTDQEI ANL | 295 |
| *****      |                                                               |     |
| 276        |                                                               |     |
| SC5314     | LIGILMGGQHTSASTSAWFLHLGKPHLQDVIYQEVVELLKEKGGDLNDLTYEDLQKLP    | 360 |
| A173-22    | LIGILMGGQHTSASTSAWFLHLGKPHLQDVIYQEVVELLKEKGGDLNDLTYEDLQKLP    | 355 |
| A1201-57   | LIGILMGGQHTSASTSAWFLHLGKPHLQDVIYQEVVELLKEKGGDLNDLTYEDLQKLP    | 355 |
| *****      |                                                               |     |
| SC5314     | SVNNTIKETLRMHMPLHSIFRKVTNPLRIPETNYIVPKGHYVLVSPGYAHTSERYFDNPE  | 420 |
| A173-22    | SVNNTIKETLRMHMPLHSIFRKVTNPLRIPETNYIVPKGHYVLVSPGYAHTSERYFDNPE  | 415 |
| A1201-57   | SVNNTIKETLRMHMPLHSIFRKVTNPLRIPETNYIVPKGHYVLVSPGYAHTSERYFDNPE  | 415 |
| *****      |                                                               |     |
| SC5314     | DFDPTRWDTAAAKANSVSFNSSDEVYDYGFKVSKGVSSPYLPFGGGRHRCIGEQFAYVQL  | 480 |
| A173-22    | DFDPTRWDTAAAKANSVSFNSSDEVYDYGFKVSKGVSSPYLPFGGGRHRCIGEQFAYVQL  | 475 |
| A1201-57   | DFDPTRWDTAAAKANSVSFNSSDEVYDYGFKVSKGVSSPYLPFGGGRHRCIGEQFAYVQL  | 475 |
| *****      |                                                               |     |
| SC5314     | GTILTTFVYNLRWTIDGYKVPDPDYSSMVVLPTEPAEIIWEKRETCMF              | 528 |
| A173-22    | GTILTTFVYNLRWTIDGYKVPDPDYSSMVVLPTEPAEIIWEKRET---              | 520 |
| A1201-57   | GTILTTFVYNLRWTIDGYKVPDPDYSSMVVLPTEPAEIIWEKRET---              | 520 |
| *****      |                                                               |     |

**Figure S3.** Alignment of nucleotide sequence (a) and amino acid sequence (b) of ERG11 gene/protein product of *C. albicans* isolates A173-22, A1201-57, and reference strain SC5314 (GenBank accession no. CP01762). Asterisk indicates identical nucleotide/amino acid among three strains. Nucleotide/amino acid which is different from that of the reference strain is shown in yellow with its number below the alignment.
