# Supplementary material for: Prevalence and Antifungal Susceptibility of Clinically Relevant Candida Species, Identification of Candida auris and Kodamaea ohmeri in Bangladesh
Source: MDPI journal article supplement (doi:10.3390/tropicalmed7090211), 2022-08-26
Supplement: s1 [file s1]

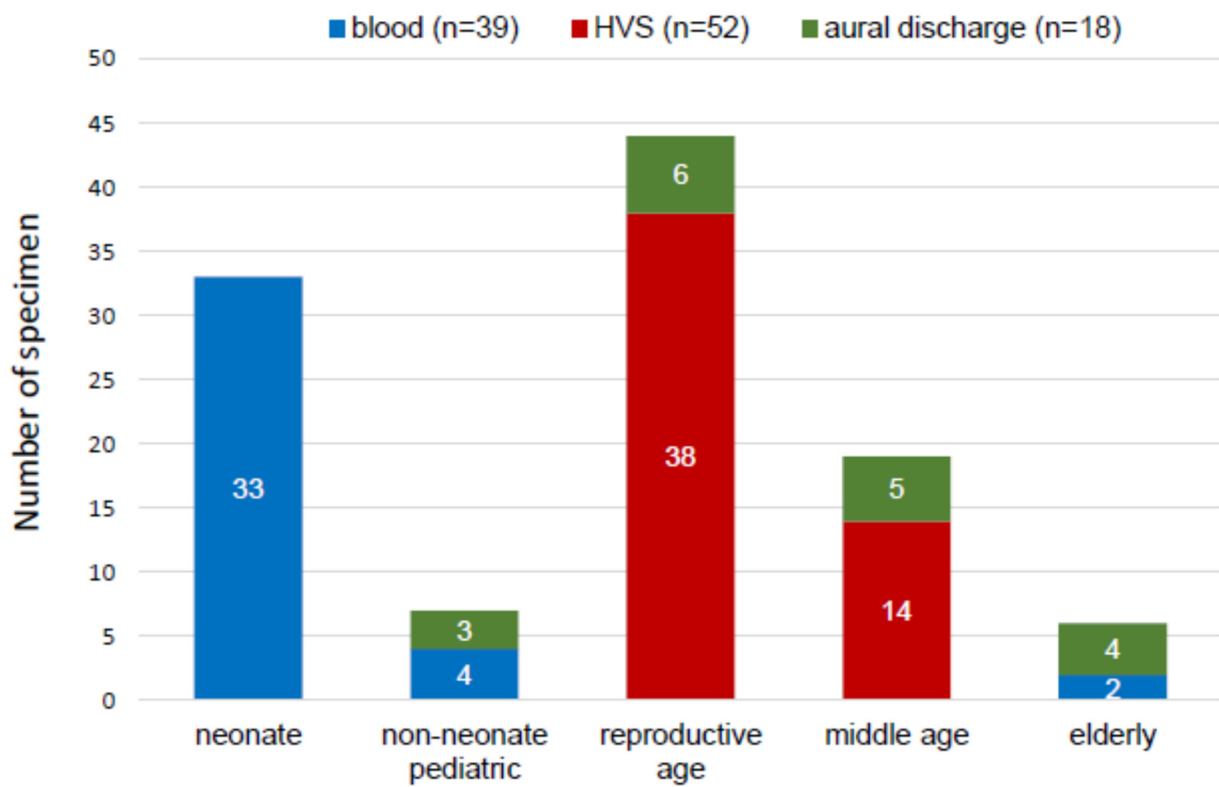

**Figure S1.** Frequency of candidiasis patients (specimen types) in each age group. Neonate, 0-28 days; non-neonate pediatric, 29 days-<18 years; reproductive age, 18-<45 years; middle age, 45-<60 years; elderly,  $\geq 65$  years. .

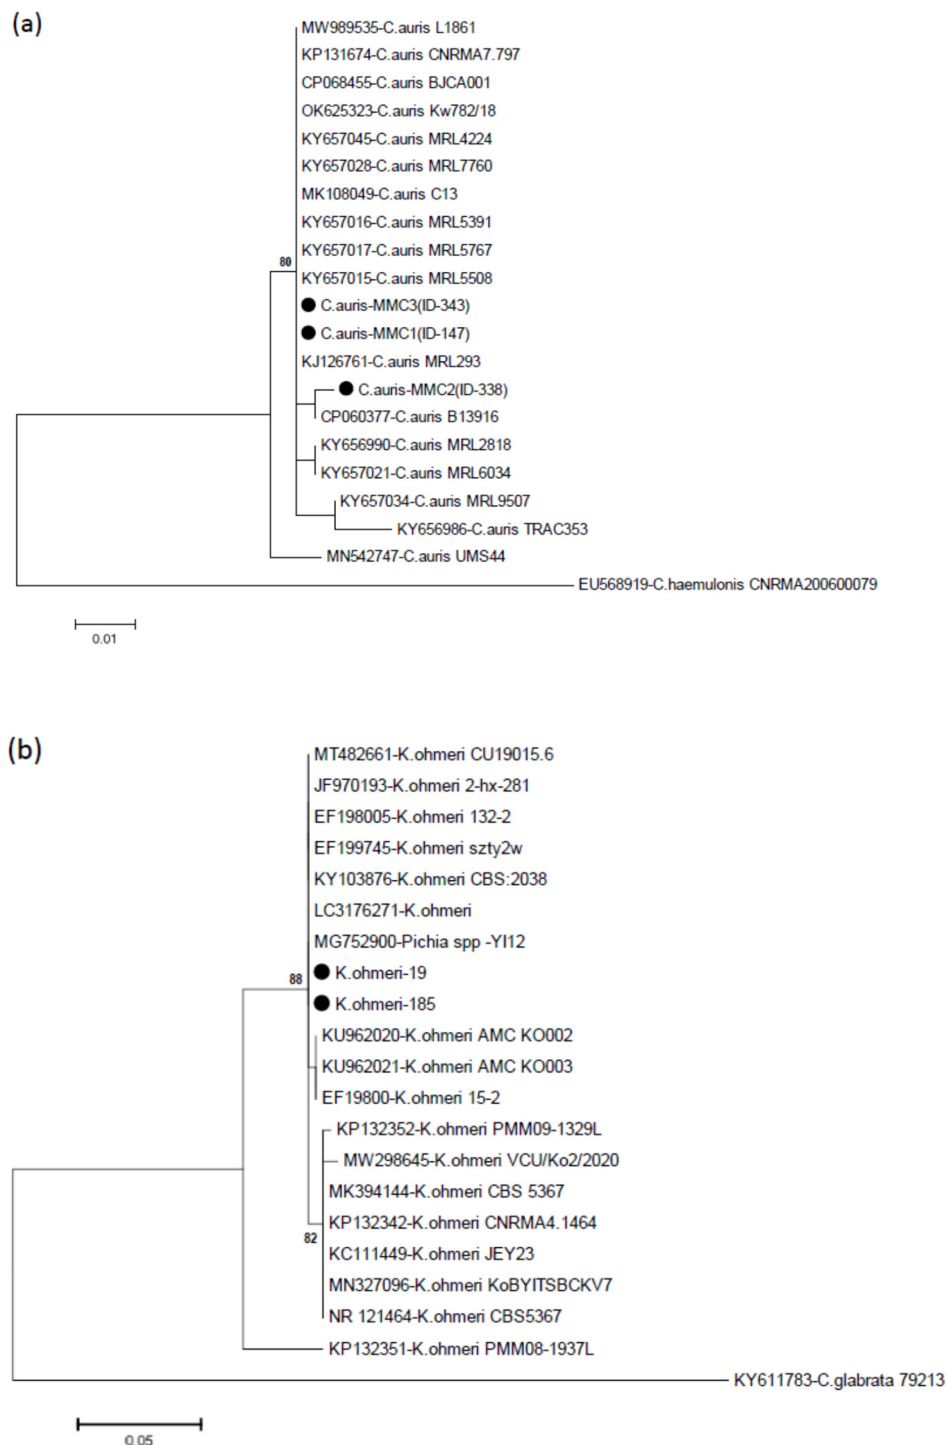

**Figure S2.** Phylogenetic dendrogram of ITS1-5.8S-ITS2 ribosomal region of the *C. auris* (a) and *K. ohmeri* (b) constructed by maximum-likelihood method with MEGA.11 program. Trees were statistically supported by bootstrapping with 1000 replicates, and genetic distances were calculated by Kimura two-parameter model. Variation scale is described at the bottom. Percent bootstrap support is indicated by the values at each node (the values < 80 are omitted). Filled circles indicate isolates analyzed in the present study. Other sequences were retrieved from GenBank database. Sequences of *C. haemulonis* CNRMA200600079 and *C. glabrata* 79213 were added as outgroup for *C. auris* and *K. ohmeri*, respectively.
