# Supplementary material for: Prevalence and Antifungal Susceptibility of Clinically Relevant Candida Species, Identification of Candida auris and Kodamaea ohmeri in Bangladesh
Source: MDPI journal article supplement (doi:10.3390/tropicalmed7090211), 2022-08-26
Supplement: s1 [file s1]

**Table S1.** Isolate numbers of each *Candida* species identified by different methods.

| <i>Candida</i><br>Species | Number of<br>Isolates | Identification Method |                           |     |                            |                                              |                                    |
|---------------------------|-----------------------|-----------------------|---------------------------|-----|----------------------------|----------------------------------------------|------------------------------------|
|                           |                       | Germ<br>Tube Test     | Chromogenic<br>Agar Media | PCR | PCR<br>followed<br>by RFLP | Citrate<br>Utilization<br>Test <sup>*1</sup> | Sequence<br>Analysis <sup>*2</sup> |
| <i>C. albicans</i>        | 40                    | 38                    | 37                        | 37  | 40                         | -                                            | -                                  |
| <i>C. parapsilosis</i>    | 25                    | 0                     | 4                         | 20  | 25                         | -                                            | -                                  |
| <i>C. ciferrii</i>        | 12                    | 0                     | 0                         | 8   | 8                          | 4                                            | -                                  |
| <i>C. tropicalis</i>      | 10                    | 0                     | 8                         | 3   | 10                         | -                                            | -                                  |
| <i>C. glabrata</i>        | 6                     | 0                     | 3                         | 6   | 6                          | -                                            | -                                  |
| <i>C. rugosa</i>          | 4                     | 0                     | 0                         | 2   | 4                          | -                                            | -                                  |
| <i>C. famata</i>          | 3                     | 0                     | 0                         | 3   | 3                          | -                                            | -                                  |
| <i>C. auris</i>           | 3                     | 0                     | 0                         | 0   | 0                          | 0                                            | 3                                  |
| <i>K. ohmeri</i>          | 2                     | 0                     | 0                         | 0   | 0                          | 0                                            | 2                                  |
| <i>C. krusei</i>          | 1                     | 0                     | 1                         | 1   | 1                          | -                                            | -                                  |
| <i>C. kefyr</i>           | 1                     | 0                     | 0                         | 1   | 1                          | -                                            | -                                  |
| <i>C. lusitaniae</i>      | 1                     | 0                     | 0                         | 1   | 1                          | -                                            | -                                  |
| <i>C. dubliniensis</i>    | 1                     | 1                     | 1                         | 0   | 1                          | -                                            | -                                  |
| Total                     | 109                   | 39                    | 54                        | 82  | 100                        | 4                                            | 5                                  |

<sup>\*1</sup> This test was done for only for isolates of which the identification by PCR-RFLP showed ambiguous results.

<sup>\*2</sup> Sequence of ITS1-5.8S-ITS2 ribosomal region was analyzed for only 5 isolates that were not identified by other methods.

**Table S2.** MIC of Fluconazole against isolated *Candida* species by broth microdilution method (n = 109).

| Candida species        | No. of Isolates | MIC (µg/mL) |   |    |    |   |    |    |    |
|------------------------|-----------------|-------------|---|----|----|---|----|----|----|
|                        |                 | 0.5         | 1 | 2  | 4  | 8 | 16 | 32 | 64 |
| <i>C. albicans</i>     | 40              | 12          | 6 | 8  | 10 | 0 | 1  | 1  | 2  |
| <i>C. parapsilosis</i> | 25              | 0           | 5 | 12 | 5  | 0 | 0  | 0  | 3  |
| <i>C. ciferrii</i>     | 12              | 0           | 0 | 2  | 2  | 0 | 0  | 0  | 8  |
| <i>C. tropicalis</i>   | 10              | 0           | 2 | 3  | 4  | 0 | 0  | 1  | 0  |
| <i>C. glabrata</i>     | 6               | 0           | 0 | 0  | 3  | 0 | 0  | 1  | 2  |
| <i>C. rugosa</i>       | 4               | 0           | 0 | 0  | 4  | 0 | 0  | 0  | 0  |
| <i>C. famata</i>       | 3               | 0           | 0 | 3  | 0  | 0 | 0  | 0  | 0  |
| <i>C. auris</i>        | 3               | 0           | 0 | 0  | 0  | 0 | 0  | 0  | 3  |
| <i>K. ohmeri</i>       | 2               | 0           | 0 | 0  | 0  | 0 | 0  | 2  | 0  |
| <i>C. krusei</i>       | 1               | 0           | 0 | 0  | 0  | 0 | 0  | 1  | 0  |
| <i>C. kefyr</i>        | 1               | 0           | 0 | 0  | 0  | 0 | 0  | 1  | 0  |
| <i>C. lusitaniae</i>   | 1               | 0           | 1 | 0  | 0  | 0 | 0  | 0  | 0  |
| <i>C. dubliniensis</i> | 1               | 0           | 1 | 0  | 0  | 0 | 0  | 0  | 0  |

*C. krusei* is intrinsically resistant to fluconazole.

**Table S3.** MIC of Amphotericin B against of *Candida* species isolated from blood using the broth microdilution method (n = 39).

| Candida species        | No. of isolates | MIC (µg/mL) |        |       |      |     |   |   |   |
|------------------------|-----------------|-------------|--------|-------|------|-----|---|---|---|
|                        |                 | 0.0032      | 0.0063 | 0.125 | 0.25 | 0.5 | 1 | 2 | 4 |
| <i>C. albicans</i>     | 4               | 0           | 0      | 0     | 2    | 2   | 0 | 0 | 0 |
| <i>C. parapsilosis</i> | 16              | 0           | 0      | 0     | 9    | 7   | 0 | 0 | 0 |
| <i>C. ciferrii</i>     | 9               | 0           | 0      | 0     | 3    | 2   | 1 | 0 | 3 |
| <i>C. rugosa</i>       | 4               | 0           | 0      | 0     | 1    | 3   | 0 | 0 | 0 |
| <i>C. auris</i>        | 3               | 0           | 0      | 0     | 0    | 0   | 0 | 0 | 3 |
| <i>C. tropicalis</i>   | 1               | 0           | 0      | 1     | 0    | 0   | 0 | 0 | 0 |
| <i>C. glabrata</i>     | 1               | 0           | 0      | 0     | 1    | 0   | 0 | 0 | 0 |
| <i>C. lusitaniae</i>   | 1               | 0           | 0      | 0     | 0    | 0   | 0 | 0 | 1 |
